# Supplementary material for: Controls on zircon age distributions in volcanic, porphyry and plutonic rocks
Source: Copernicus journal article supplement (doi:10.5194/gchron-7-15-2025), 2025-02-18
Supplement: Supplementary file 2 [file gchron-7-15-2025-supplement.zip]

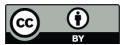

## *Supplement of*

# **Controls on zircon age distributions in volcanic, porphyry and plutonic rocks**

**Chetan Nathwani et al.**

*Correspondence to:* Chetan Nathwani (chetan.nathwani@eaps.ethz.ch)

- gchron-7-15-2025-supplement-title-page.pdf
- Supplement
  - GChron\_Supplementary\_Material.pdf
  - Table S1.csv

The copyright of individual parts of the supplement might differ from the article licence.
